# Supplementary material for: Hepatobiliary Events in Migraine Therapy with Herbs—The Case of Petadolex, A Petasites Hybridus Extract
Source: PubMed Central journal article supplement (PMC6572430; doi:10.3390/jcm8050652), 2019-05-10
Supplement: jcm-08-00652-s001.pdf [file jcm-08-00652-s001.pdf]

**SUPPLEMENTARY DATA**

**Hepatobiliary events in migraine therapy with herbs – The case of  
Petadolex, a Petasites hybridus extract**

Nora Anderson and Jürgen Borlak

Hannover Medical School, Centre for Pharmacology and Toxicology, Carl-Neuberg-Str. 1,

30625 Hannover, Germany

E-mail: [Borlak.Juergen@mh-hannover.de](mailto:borlak.juergen@mh-hannover.de)

**Supplementary Figure S1.** Serum biochemistry changes (ALT, AST, GGT) in regards to dose and time to onset of HILI.

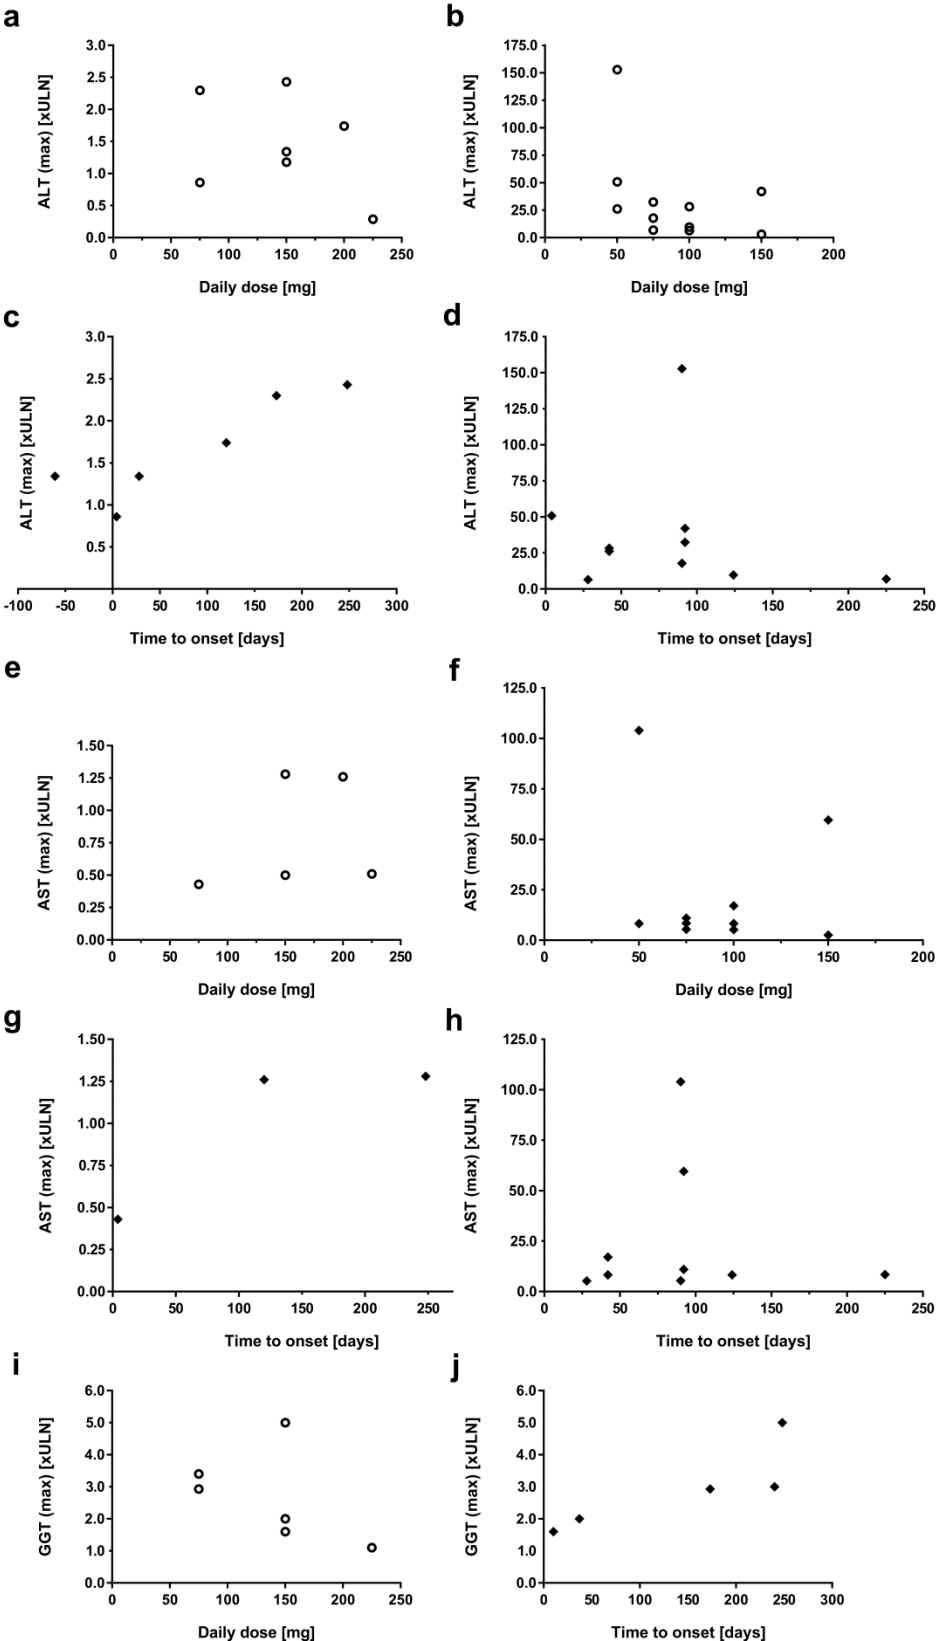

**Panel A:** ALT in relation to dose  $\leq 3x$  ULN

**Panel B:** ALT in relation to dose  $> 3x$  ULN

**Panel C:** ALT in relation to time to onset  $\leq 3x$  ULN

**Panel D:** ALT in relation to time to onset  $> 3x$  ULN

**Panel E:** AST in relation to dose  $\leq 3x$  ULN

**Panel F:** AST in relation to dose  $> 3x$  ULN

**Panel G:** AST in relation to time to onset  $\leq 3x$  ULN

**Panel H:** AST in relation to time to onset  $> 3x$  ULN

**Panel I:** GGT in relation to dose

**Panel J:** GGT in relation to time to onset

**Supplementary Table S1:** Information on individual human donors, which donated liver tissue for the generation of human hepatocyte cultures.

| <b>Donor ID</b> | <b>Sex</b> | <b>Age</b> | <b>Diagnosis</b>                         |
|-----------------|------------|------------|------------------------------------------|
| 1               | Male       | 67         | Klatskin Tumor                           |
| 2               | Male       | 74         | Liver metastasis of colorectal carcinoma |
| 3               | Male       | 69         | Liver metastasis of colorectal carcinoma |
| 4               | Male       | 57         | Liver metastasis of colorectal carcinoma |
| 5               | Female     | 77         | Liver metastasis of ovarian tumor        |
| 6               | Male       | 57         | Liver metastasis of colorectal carcinoma |
| 7               | Male       | 36         | Liver metastasis of colorectal carcinoma |
| 8               | Female     | 41         | Liver metastasis of ovarian tumor        |
| 9               | Male       | 50         | Liver metastasis of colorectal carcinoma |

**Supplementary Table S2:** Clinical biochemistry data and major histopathology findings after repeated oral dosing of rats with a *Petasites hybridus* extract for 6 months.

| Study group                                    | Vehicle control  |                  | 45mg/kg          |                  | 135 mg/kg        |                  | 270 mg/kg        |                  |
|------------------------------------------------|------------------|------------------|------------------|------------------|------------------|------------------|------------------|------------------|
| gender                                         | M                | F                | M                | F                | M                | F                | M                | F                |
| <b>Serum biochemistry</b>                      |                  |                  |                  |                  |                  |                  |                  |                  |
| AST*                                           | 30.05<br>(±1.52) | 32.60<br>(±2.47) | 32.30<br>(±2.80) | 29.50<br>(±4.06) | 29.40<br>(±1.06) | 27.10<br>(±1.15) | 26.48<br>(±5.46) | 25.88<br>(±3.15) |
| Bilirubin*                                     | 1.81<br>(±0.59)  | 2.03<br>(±0.43)  | 2.04<br>(±0.86)  | 2.13<br>(±0.74)  | 2.48<br>(±0.97)  | 2.15<br>(±0.92)  | 3.35<br>(±1.74)  | 2.13<br>(±0.76)  |
| ALAT*                                          | 18.23<br>(±1.65) | 15.58<br>(±2.89) | 20.09<br>(±0.95) | 19.17<br>(±5.73) | 20.40<br>(±2.10) | 16.60<br>(±2.38) | 15.43<br>(±1.71) | 13.13<br>(±1.23) |
| GGT *                                          | 0.68<br>(±0.53)  | 0.68<br>(±0.61)  | 1.03<br>(±0.78)  | 0.77<br>(±0.15)  | 1.13<br>(±0.25)  | 0.83<br>(±0.55)  | 2.10<br>(±1.66)  | 2.85<br>(±2.15)  |
| AP *                                           | 162.78<br>±82.07 | 111.23<br>±53.88 | 180.10<br>±87.04 | 87.87<br>±47.33  | 179.43<br>±84.68 | 93.20<br>±43.68  | 156.70<br>±83.40 | 89.35<br>±41.81  |
| <b>Histological findings</b>                   |                  |                  |                  |                  |                  |                  |                  |                  |
| Focal lymphocytosis **<br>(number of animals)  | 0                | 2                | 4                | 4                | 5                | 4                | 1                | 3                |
| Bile duct hyperplasia**<br>(number of animals) | 0                | 0                | 0                | 0                | 10               | 5                | 17               | 13               |
| Bile duct dilatation**<br>(number of animals)  | 0                | 0                | 0                | 0                | 0                | 0                | 16               | 3                |
| Minimal lipidosis**<br>(number of animals)     | 7                | 4                | 5                | 4                | 4                | 3                | 9                | 6                |

\* 4 animals per dose and gender; data are units per liter

\*\* 20 animals per dose and gender; data are individual animals with a histological finding
